# Supplementary material for: Phosphorylation of glutaminase by PKCε is essential for its enzymatic activity and critically contributes to tumorigenesis
Source: PubMed Central journal article supplement (PMC5993826; doi:10.1038/s41422-018-0021-y), 2018-03-07
Supplement: 41422_2018_21_MOESM1_ESM.pdf [file 41422_2018_21_MOESM1_ESM.pdf]

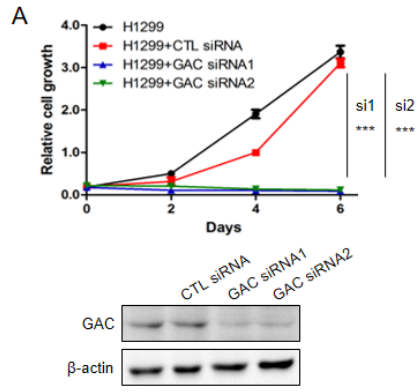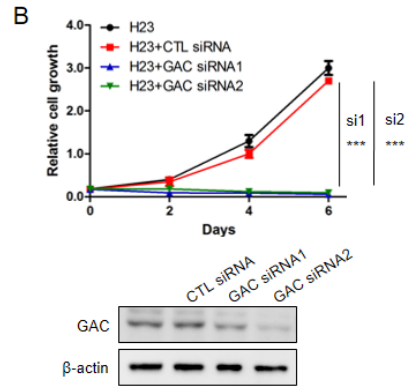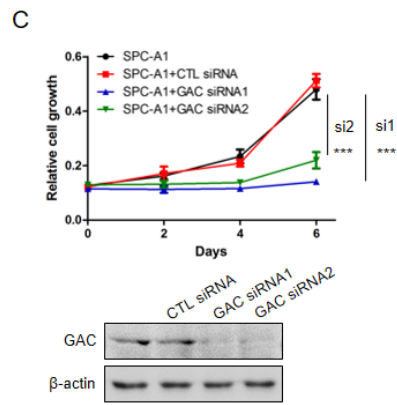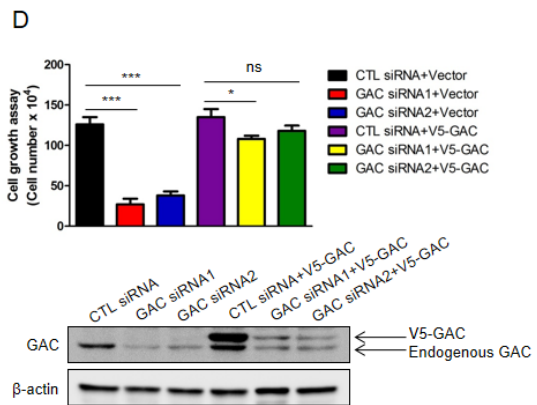

**Supplementary information, Figure S1. Glutaminase is important for the growth of NSCLC.** (A-C) NSCLC cells (H1299, H23 and SPC-A1) were cultured in RPMI 1640 with 10% FBS. Cells were transiently transfected with either control siRNA or GAC siRNAs. At the indicated times, cells were fixed in 3.7% formaldehyde and stained with 0.1% crystal violet. Dye was extracted with 10% acetic acid and the relative proliferation was determined by the absorbance at 595nm. Data represent the average of three independent experiments (mean  $\pm$ SD). \*\*\*  $P < 0.001$  (Top figures). The knockdown efficiency of the siRNAs targeting GAC was determined by western blotting using an anti-GAC antibody (Bottom figures). (D) H1299 cells were co-transfected with control siRNA (CTL siRNA) or GAC siRNAs and empty vector or pcDNA3.1-V5-GAC (V5-GAC). 24 hours later, cells were seeded in 12-well plates at  $10^5$  cells per well in 2 ml complete culture medium. Medium was changed every 2 days. After 6 days, cell number was counted. Data represent the average of three independent experiments (mean  $\pm$ SD). \*  $P < 0.05$ , \*\*\*  $P < 0.001$ , ns:  $P > 0.05$  (Top figure). The protein expression was determined by western blotting using indicated antibodies (Bottom figure).
