# Supplementary material for: Phosphorylation of glutaminase by PKCε is essential for its enzymatic activity and critically contributes to tumorigenesis
Source: PubMed Central journal article supplement (PMC5993826; doi:10.1038/s41422-018-0021-y), 2018-03-07
Supplement: 41422_2018_21_MOESM3_ESM.pdf [file 41422_2018_21_MOESM3_ESM.pdf]

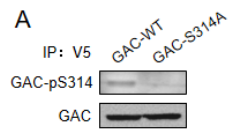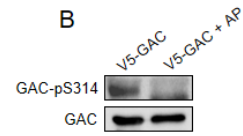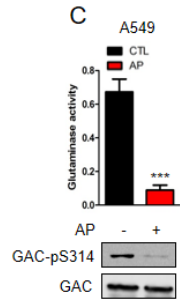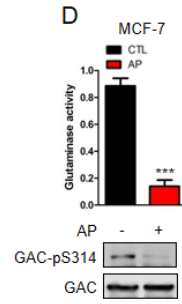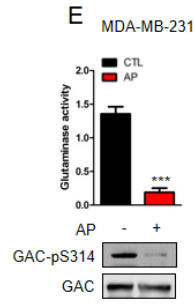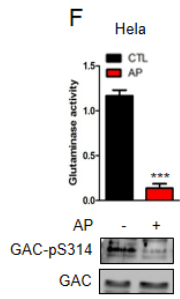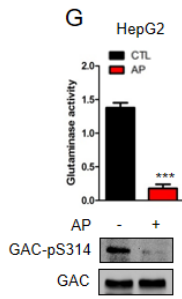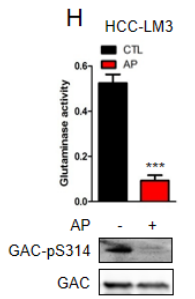

**Supplementary information, Figure S3. The alkaline phosphatase treatment inhibits glutaminase activity in different types of cancer cells.** (A) H1299 cells transiently transfected with V5-tagged GAC-WT or GAC-S314A were lysed and immunoprecipitated using an anti-V5 antibody. The lysates were blotted using indicated antibodies. (B) The PVDF membrane from Figure 2B was striped and detected by western blotting using an anti-GAC-pS314 antibody. (C-H) Lung cancer cells (A549), breast cancer cells (MDA-MB-231, MCF-7), cervical cancer cells (Hela) and hepatocarcinoma cells (HepG2, HCC-LM3) were lysed for immunoprecipitation using an anti-GAC antibody. The samples were treated with or without alkaline phosphatase (AP) for 1 hour at 37°C, then the glutaminase activity was assayed. Data represent the average of three independent experiments (mean±SD). \* \* \*  $P < 0.001$ . Immunoblotting was done using indicated antibodies.
