# Supplementary material for: Phosphorylation of glutaminase by PKCε is essential for its enzymatic activity and critically contributes to tumorigenesis
Source: PubMed Central journal article supplement (PMC5993826; doi:10.1038/s41422-018-0021-y), 2018-03-07
Supplement: 41422_2018_21_MOESM4_ESM.pdf [file 41422_2018_21_MOESM4_ESM.pdf]

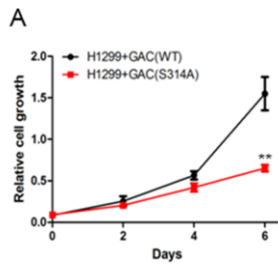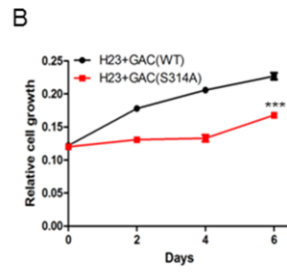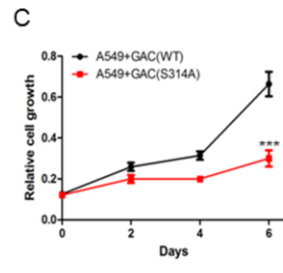

**Supplementary information, Figure S4. GAC phosphorylation at S314 plays a key role in the growth of NSCLC cells.** (A-C) H1299, H23 and A549 cells transiently transfected with GAC(WT) or GAC(S314A) mutant were cultured in RPMI 1640 with 10% FBS for indicated times, and then cells were fixed in 3.7% formaldehyde and stained with 0.1% crystal violet. Dye was extracted with 10% acetic acid and the relative proliferation was assessed from the increase in absorbance at 595nm. Data represent the average of three independent experiments (mean±SD). \*\* $P<0.01$ , \*\*\* $P<0.001$ .
