# Supplementary material for: Phosphorylation of glutaminase by PKCε is essential for its enzymatic activity and critically contributes to tumorigenesis
Source: PubMed Central journal article supplement (PMC5993826; doi:10.1038/s41422-018-0021-y), 2018-03-07
Supplement: 41422_2018_21_MOESM5_ESM.pdf [file 41422_2018_21_MOESM5_ESM.pdf]

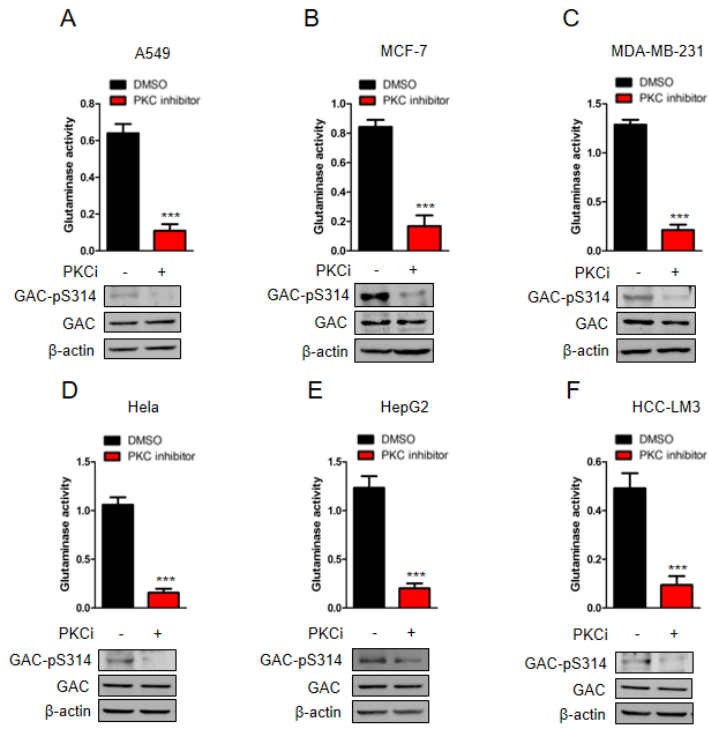

**Supplementary information, Figure S5. PKC $\epsilon$  inhibitor blocks glutaminase activity in different types of cancer cells.** (A-F) Lung cancer cells (A549), breast cancer cells (MDA-MB-231, MCF-7), cervical cancer cells (Hela) and hepatocarcinoma cells (HepG2, HCC-LM3) were treated with PKC $\epsilon$  inhibitor (Staurosporine, 50nM) for 24 hours. Then, mitochondria were isolated and glutaminase activity was examined. Data represent the average of three independent experiments (mean $\pm$ SD). \*\*\* $P$ <0.001. The expression of indicated proteins was examined by western blotting.
