# Supplementary material for: Phosphorylation of glutaminase by PKCε is essential for its enzymatic activity and critically contributes to tumorigenesis
Source: PubMed Central journal article supplement (PMC5993826; doi:10.1038/s41422-018-0021-y), 2018-03-07
Supplement: 41422_2018_21_MOESM6_ESM.pdf [file 41422_2018_21_MOESM6_ESM.pdf]

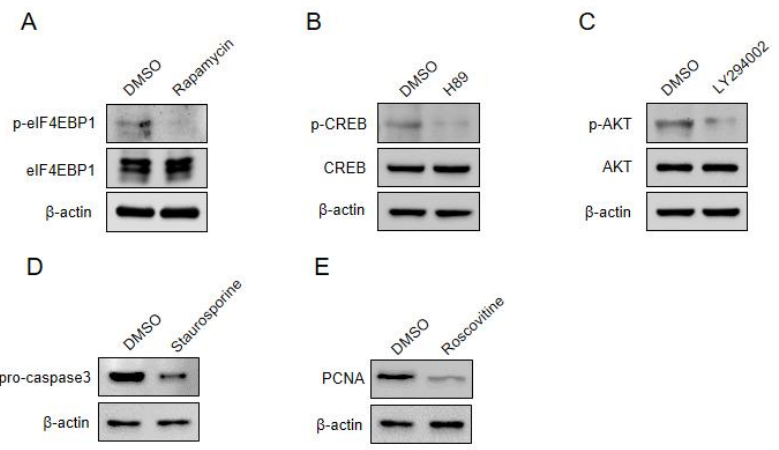

**Supplementary information, Figure S6. Different kinase inhibitors work well in H1299 cells.** (A-E) H1299 cells were treated with mTOR inhibitor (Rapamycin, 100nM), PKA inhibitor (H89, 20 $\mu$ M), AKT inhibitor (LY294002, 10 $\mu$ M), general PKC inhibitor (Staurosporine, 50nM) and CDK1 inhibitor (Roscovitine, 15 $\mu$ M) for 24 hours. Then, the cells were lysed and the expressions of indicated proteins were determined by western blotting.
