# Supplementary material for: Phosphorylation of glutaminase by PKCε is essential for its enzymatic activity and critically contributes to tumorigenesis
Source: PubMed Central journal article supplement (PMC5993826; doi:10.1038/s41422-018-0021-y), 2018-03-07
Supplement: 41422_2018_21_MOESM7_ESM.pdf [file 41422_2018_21_MOESM7_ESM.pdf]

A

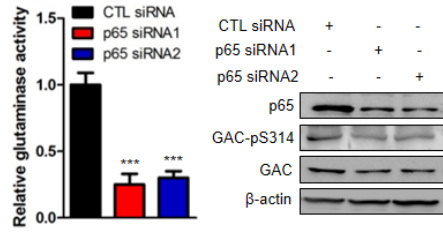

B

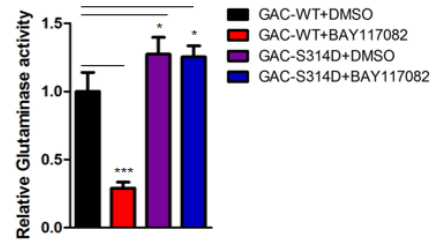

C

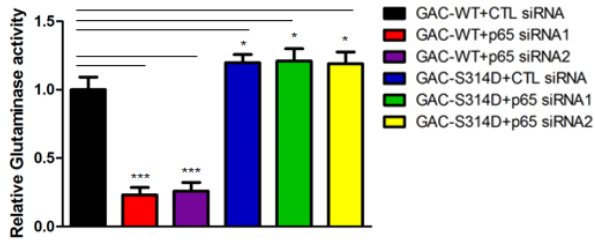

**Supplementary information, Figure S7. NF- $\kappa$ B regulates the phosphorylation of GAC at Ser314.** (A) A549 cells were transiently transfected with control siRNA (CTL siRNA) or NF- $\kappa$ B (p65) siRNAs and mitochondria were isolated. Then the glutaminase activity was detected. Data represent the average of three independent experiments (mean $\pm$ SD). \*\*\* $P$ <0.001 (Left figure). Cells transfected with control or p65 siRNAs were lysed and probed using indicated antibodies (Right figure). (B) H1299 cells were transiently transfected with V5-tagged GAC-WT or GAC-S314D. 24 hours later, the cells were treated with or without 5 $\mu$ M Bay117082 for 24 hours and lysed for immunoprecipitation using the anti-V5 antibody. The glutaminase activity assay was then performed. Data represent the average of three independent experiments (mean $\pm$ SD). \* $P$ <0.05, \*\*\* $P$ <0.001. (C) H1299 cells were co-transfected with indicated siRNAs and GAC-WT or GAC-S314D and then lysed for immunoprecipitation using the anti-V5 antibody, and the glutaminase activity assay was done. Data represent the average of three independent experiments (mean $\pm$ SD). \* $P$ <0.05, \*\*\* $P$ <0.001.
