# Supplementary material for: Phosphorylation of glutaminase by PKCε is essential for its enzymatic activity and critically contributes to tumorigenesis
Source: PubMed Central journal article supplement (PMC5993826; doi:10.1038/s41422-018-0021-y), 2018-03-07
Supplement: 41422_2018_21_MOESM8_ESM.pdf [file 41422_2018_21_MOESM8_ESM.pdf]

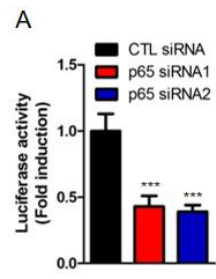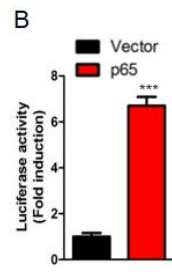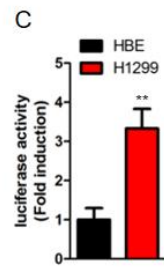

**Supplementary information, Figure S8. PKC $\epsilon$  is a new downstream target of NF- $\kappa$ B. (A)**

A549 cells were co-transfected with pGL3-enhancer vector containing PKC $\epsilon$  promoter, Renilla control plasmid, and control siRNA (CTL siRNA) or NF- $\kappa$ B (p65) siRNAs. The relative levels of luciferase activity were normalized to the levels in untreated cells and to the levels of luciferase activity of the Renilla control plasmid. Data represent the average of three independent experiments (mean $\pm$ SD). \*\*\* $P$ <0.001. **(B)** A549 cells were co-transfected with pGL3-enhancer vector containing PKC $\epsilon$  promoter fragment, Renilla control plasmid and pcDNA3.0 empty vector or pcDNA3.0-p65 plasmid. The relative levels of luciferase activity were normalized to the levels in cells transfected with vector control and to the levels of luciferase activity of the Renilla control plasmid. Data represent the average of three independent experiments (mean $\pm$ SD). \*\*\* $P$ <0.001. **(C)** pGL3-enhancer vector containing PKC $\epsilon$  promoter fragment was transfected into HBE or H1299 cells. The relative levels of luciferase activity were normalized to the levels in HBE cells and to the levels of luciferase activity of the Renilla control plasmid. Data represent the average of three independent experiments (mean $\pm$ SD). \*\* $P$ <0.01.
