# Supplementary material for: Phosphorylation of glutaminase by PKCε is essential for its enzymatic activity and critically contributes to tumorigenesis
Source: PubMed Central journal article supplement (PMC5993826; doi:10.1038/s41422-018-0021-y), 2018-03-07
Supplement: 41422_2018_21_MOESM10_ESM.pdf [file 41422_2018_21_MOESM10_ESM.pdf]

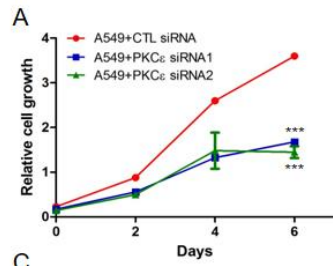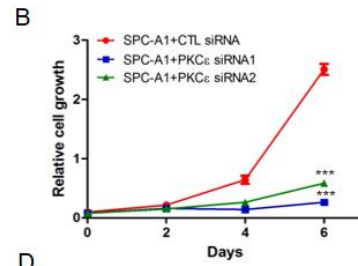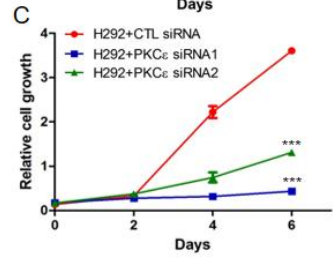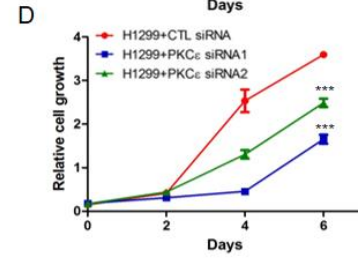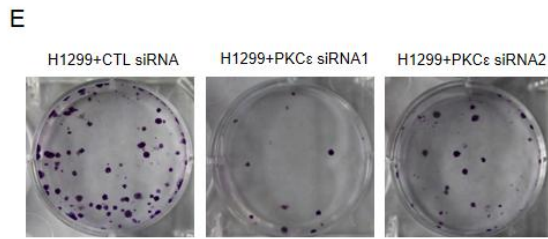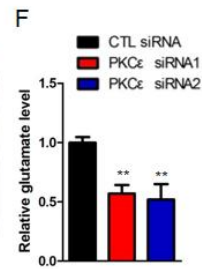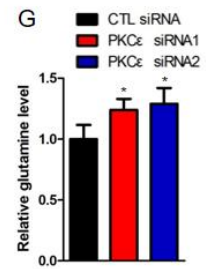

**Supplementary information, Figure S10. Knocking down PKC $\epsilon$  inhibits the growth and glutamine metabolism of NSCLC cells.** (A-D) NSCLC cell lines A549 (A), SPC-A1 (B), H292 (C), and H1299 (D) were transiently transfected with either control siRNA (CTL siRNA) or PKC $\epsilon$  siRNAs. 24 hours later, the cells were seeded in 24-well plates at 3000 cells per well in 0.5 ml medium with 10% FBS. At the indicated times, cells were fixed in 3.7% formaldehyde and stained with 0.1% crystal violet. Dye was extracted with 10% acetic acid and the relative proliferation was determined by the absorbance at 595nm. Data represent the average of three independent experiments (mean $\pm$ SD). \* \* \*  $P < 0.001$ . (E) H1299 cells were transiently transfected with either control siRNA (CTL siRNA) or PKC $\epsilon$  siRNAs. 24 hours later, the cells were seeded in 6-well plate at 500 cells per well in 2 ml medium with 10% FBS. 10 days later, cells were fixed in 3.7% formaldehyde and stained with 0.1% crystal violet. (F and G) H1299 cells were transiently transfected with either control siRNA (CTL siRNA) or PKC $\epsilon$  siRNAs. 48 hours later, the cells were collected and glutamate (F) and glutamine (G) were determined by different kits. Data represent the average of three independent experiments (mean $\pm$ SD). \*  $P < 0.05$ , \* \*  $P < 0.01$ .
