# Supplementary material for: Phosphorylation of glutaminase by PKCε is essential for its enzymatic activity and critically contributes to tumorigenesis
Source: PubMed Central journal article supplement (PMC5993826; doi:10.1038/s41422-018-0021-y), 2018-03-07
Supplement: 41422_2018_21_MOESM11_ESM.pdf [file 41422_2018_21_MOESM11_ESM.pdf]

A

GLS (S314A) mutation KI A549 cell line sequencing results

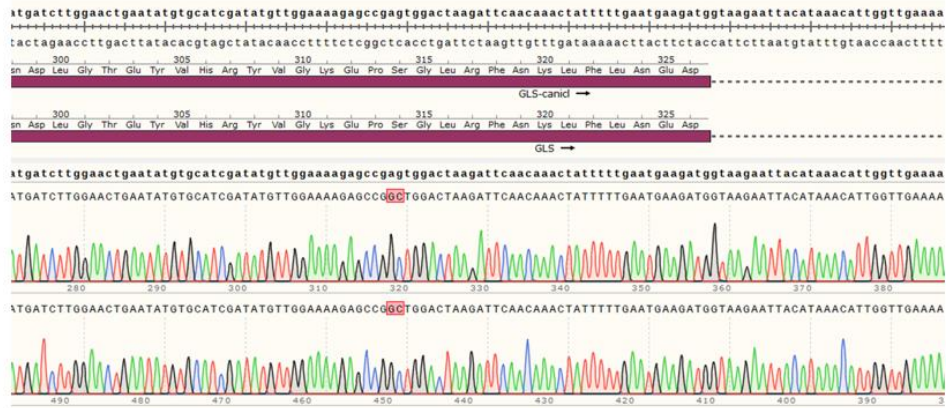

B

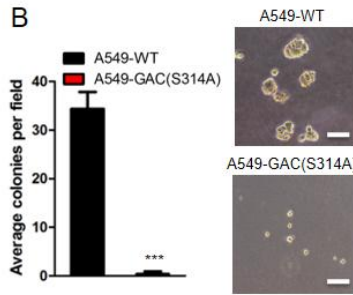

C

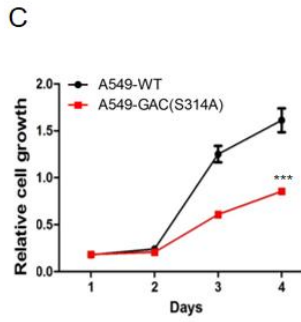

D

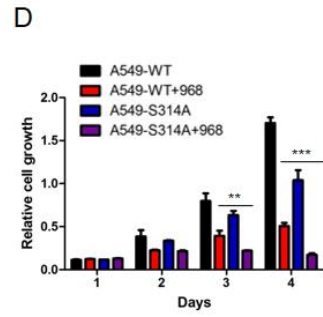

**Supplementary information, Figure S11. S11 Inhibition of GAC phosphorylation at S314**

**reverses the transformed phenotypes of A549 cells.** (A) Schematic depiction of the

sequencing results for GLS (S314A) mutation in A549 cells. (B) Soft agar assay. A549-WT

cells or A549-GAC(S314A) stable cells were suspended with RPMI 1640 supplemented with

10% FBS and 0.3% agarose followed by plating on top of a solidified layer of RPMI 1640

supplemented with 10% FBS and 0.5% agarose. Two weeks later, colonies larger than 50 $\mu$ M

were scored. Data represent the average of three independent experiments (mean $\pm$ SD). \*\*\*

$P < 0.001$  (Left figure). The photographs of colonies in soft agar assay. Scale bars: 100 $\mu$ m.

(Right figure). (C) A549-WT and A549-GAC(S314A) cells were cultured in RPMI 1640 with

10% FBS for indicated times, and then cells were fixed in 3.7% formaldehyde and stained with

0.1% crystal violet. Dye was extracted with 10% acetic acid and the relative proliferation was

determined by the absorbance at 595nm. Data represent the average of three independent

experiments (mean $\pm$ SD). \*\*\*  $P < 0.001$ . (D) A549-WT cells and A549-GAC (S314A) cells

were treated with or without 10 $\mu$ M 968 for the indicated times, and then cells were fixed in 3.7%

formaldehyde and stained with 0.1% crystal violet. Dye was extracted with 10% acetic acid and

the relative proliferation was determined by the absorbance at 595nm. Data represent the

average of three independent experiments (mean $\pm$ SD). \*\*  $P < 0.01$ , \*\*\*  $P < 0.001$ .
