# Supplementary material for: Phosphorylation of glutaminase by PKCε is essential for its enzymatic activity and critically contributes to tumorigenesis
Source: PubMed Central journal article supplement (PMC5993826; doi:10.1038/s41422-018-0021-y), 2018-03-07
Supplement: 41422_2018_21_MOESM12_ESM.pdf [file 41422_2018_21_MOESM12_ESM.pdf]

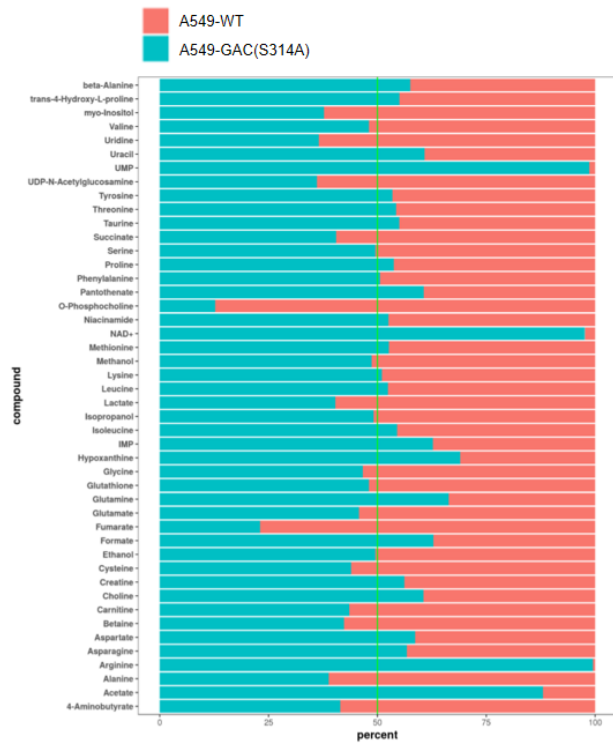

**Supplementary information, Figure S12. The metabolomics analysis in A549-WT cells and A549-GAC (S314A) cells.** The percentage of different metabolites between A549-WT cells (red) and A549-GAC (S314A) cells (green).
