# Supplementary material for: Phosphorylation of glutaminase by PKCε is essential for its enzymatic activity and critically contributes to tumorigenesis
Source: PubMed Central journal article supplement (PMC5993826; doi:10.1038/s41422-018-0021-y), 2018-03-07
Supplement: 41422_2018_21_MOESM13_ESM.pdf [file 41422_2018_21_MOESM13_ESM.pdf]

A. The mass spectrometry analysis of phosphorylation sites in HBE cell

| Phosphorylation sites | Peptide sequence         |
|-----------------------|--------------------------|
| T170                  | RT#SDPRL                 |
| S171                  | RTS#DPRL                 |
| T185                  | KECMDMLRLT#LQTTSDGVMLDKD |
| S242                  | KKQS#GGKV                |
| S380                  | KMAGNEYVGFSNATFQS#ERE    |
| S593                  | RMES#LGERS               |

C. Comparing the phosphorylation sites in H1299 with HBE cells

| HBE  | H1299 |
|------|-------|
| T170 | T112  |
| S171 | S171  |
| T185 | T185  |
| S242 | T188  |
| S380 | S274  |
| S593 | T278  |
|      | S314  |
|      | S511  |
|      | S576  |
|      | S593  |

B. The mass spectrometry analysis of phosphorylation sites in H1299 cell

| Phosphorylation sites | Peptide sequence              |
|-----------------------|-------------------------------|
| T112                  | KDSPGET#DAFGNSEGKEMVAAGDNKIKQ |
| S171                  | RTS#DPRL                      |
| T185                  | RLT#LQTTSDGVMLDKD             |
| T188                  | RLTLQT#TSDGVMLDKD             |
| S274                  | RHS#IGDTKV                    |
| T278                  | RHSIGDT#KV                    |
| S314                  | KEPS#GLRFNKL                  |
| S511                  | KMGNS#VKG                     |
| S576                  | KKVS#PESSDDTSTTVVYRMESLGERS   |
| S593                  | RMES#LGERS                    |

**Table S1.** The GAC phosphorylation sites in HBE cells and H1299 cells. **(A)** The mass spectrometry analysis of GAC phosphorylation sites in HBE cells. **(B)** The mass spectrometry analysis of GAC phosphorylation sites in H1299 cells. **(C)** Comparing the GAC phosphorylation sites in H1299 cells with those in HBE cells from the mass spectrometry analysis results.
